# Supplementary material for: Structural and photoelectron spectroscopic study on the heterotrinuclear nickel–titanium dioxide carbonyl complexes Ni2TiO2(CO)n− (n = 2–4)
Source: Royal Society of Chemistry journal article supplement (doi:10.1039/d2ra07918f), 2023-01-01
Supplement: d2ra07918f1.pdf [file d2ra07918f1.pdf]

# Structural and Photoelectron Spectroscopic Study on the Heterotrinary Nickel-Titanium Dioxide Carbonyl Complexes $\text{Ni}_2\text{TiO}_2(\text{CO})_n^-$ ( $n = 2-4$ )

Shihu Du,<sup>a,d</sup> Haiyan Han,<sup>a\*</sup> Yongliang Yan,<sup>b</sup> Yantao Lv,<sup>b</sup> Zhihui Fan,<sup>a</sup> Xiuhong Liu,<sup>a</sup>  
Xiaoqing Liang,<sup>c</sup> Hua Xie,<sup>d</sup> Zhi Zhao,<sup>\*a</sup> Ruili Shi<sup>\*a</sup>

## Theoretical supplement

The simulated photoelectron spectrum for a given isomer is based on the generalized Koopmans' theorem in the text. This theory was chosen for simulation because generalized Koopmans' theorem enhances the accuracy of simulated photoelectron spectra by adding a correction term compare with other methods (simple FC calculations, namely). The simulations are done by fitting the distribution of calculated vertical detachment energies with unit-area Gaussian functions of 0.1 eV width. In our experiment, the experimental temperature is generally between 200 K and 300 K, and the anion that has not been stripped of electrons has certain stability and the ground state structure is undoubtedly. The starting geometries in this work are built manually since the cluster size is small and the potential energy surface is simple. The frequency analyses at the same level of theory with geometry optimizations were performed to confirm that each optimized structure is a true minimum on potential energy surface without imaginary frequency. The vibrational frequencies are harmonic without augmented or scaled.

---

\* a. School of Mathematics and Physics Science and Engineering, Hebei University of Engineering, Handan 056038, China. E-mail: hanhy0226@163.com; zhaozhi@hebeu.edu.cn; shiruili@hebeu.edu.cn

b. School of Information and Electrical Engineering, Hebei University of Engineering, Handan 056038, China

c. Department of Physics, Taizhou University, Taizhou 318000, China

d. State Key Laboratory of Molecular Reaction Dynamics, Dalian Institute of Chemical Physics, Chinese Academy of Sciences, Dalian 116023, China

**Table S1** The total energies of several anion isomers of  $\text{Ni}_2\text{TiO}_2(\text{CO})_n^-$  ( $n = 2-4$ ) clusters with different spin multiplicities.

| Isomers | Spin multiplicities of anion |              |              |
|---------|------------------------------|--------------|--------------|
|         | 2                            | 4            | 6            |
| 2b      | -4244.348743                 | -4244.262552 | -4244.242933 |
| 3g      | -4357.701052                 | -4357.658169 | -4357.589649 |
| 4g      | -4471.154167                 | -4471.119377 | -4471.046811 |

**Table S2** The total energies of several neutral isomers of  $\text{Ni}_2\text{TiO}_2(\text{CO})_n$  ( $n = 2, 3$ ) clusters with different spin multiplicities.

| Isomers | Spin multiplicities of neutral |              |              |
|---------|--------------------------------|--------------|--------------|
|         | 1                              | 3            | 5            |
| 2b      | -4244.286485                   | -4244.233634 | -4244.142455 |
| 2c      | -4244.249117                   | -4244.221672 | -4244.146018 |
| 3a      | -4357.697821                   | -4357.658967 | -4357.582955 |
| 3b      | -4357.689148                   | -4357.637411 | -4357.549248 |
| 3d      | -4357.672637                   | -4357.626822 | -4357.543071 |

**Table S3** Experimental and theoretical vertical detachment energies (VDEs) and adiabatic detachment energies (ADEs) as well as theoretical relative energies ( $\Delta E$ ) of the higher energy structures of  $\text{Ni}_2\text{TiO}_2(\text{CO})_n^-$  ( $n = 3, 4$ ) clusters.

| $n$ | Isomers | $\Delta E$ (eV) | VDE (eV) |         | ADE (eV) |         |
|-----|---------|-----------------|----------|---------|----------|---------|
|     |         |                 | Theo.    | Exp.    | Theo.    | Exp.    |
| 3   | 3d      | 0.6             | 2.87     | 2.76(4) | 2.61     | 2.43(5) |
|     | 3e      | 1.17            | 2.60     |         | 2.49     |         |
|     | 3f      | 1.48            | 3.20     |         | 3.02     |         |
|     | 3g      | 1.88            | 3.09     |         | 2.22     |         |
| 4   | 4d      | 0.56            | 3.15     | 2.86(3) | 2.64     | 2.60(5) |
|     | 4e      | 0.72            | 3.13     |         | 2.88     |         |
|     | 4f      | 0.73            | 3.64     |         | 2.76     |         |
|     | 4g      | 0.84            | 3.24     |         | 1.87     |         |
|     | 4h      | 0.93            | 3.00     |         | 2.70     |         |
|     | 4i      | 1.18            | 3.06     |         | 2.91     |         |
|     | 4j      | 1.18            | 3.00     |         | 2.85     |         |
|     | 4k      | 1.75            | 3.10     |         | 2.84     |         |

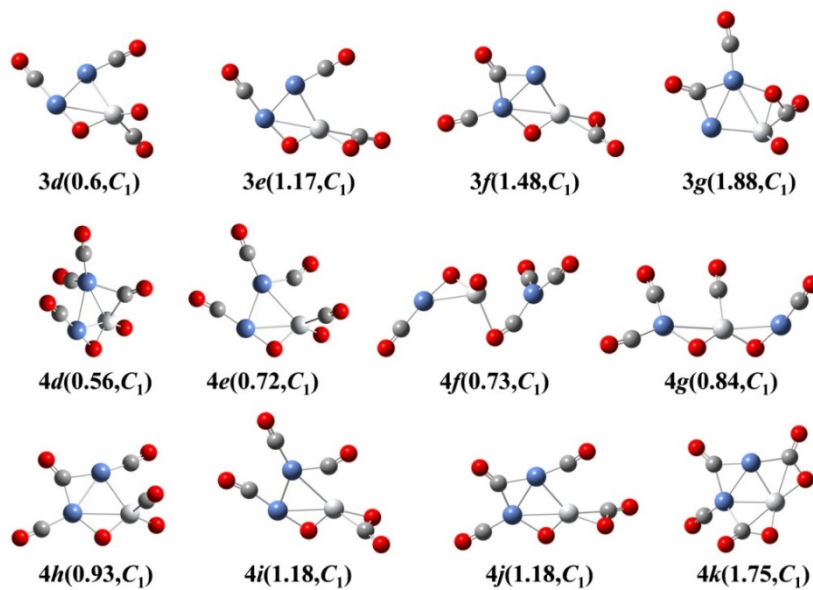

**Figure S1** Schematic diagrams of the isomers with higher energies of  $\text{Ni}_2\text{TiO}_2(\text{CO})_n^-$  ( $n = 3, 4$ ) clusters (Ti, white; Ni, blue; C, gray; O, red). The relative energy (in units of eV) and symmetry of each cluster are in parentheses.

Cartesian coordinates of all carbonyl isomers of  $\text{Ni}_2\text{TiO}_2(\text{CO})_n^-$  ( $n = 2-4$ ) are shown below. The calculations were performed at the BP86 level of theory.

**2a**

|    |             |             |             |
|----|-------------|-------------|-------------|
| Ti | -0.00008500 | -0.25860700 | 0.00002900  |
| Ni | 2.63190000  | -0.21260200 | -0.28861700 |
| Ni | -2.63192500 | -0.21274100 | 0.28846800  |
| O  | 1.21552100  | -1.22174400 | -0.83161600 |
| O  | -1.21555600 | -1.22187400 | 0.83171100  |
| C  | -3.81119500 | 0.87724500  | -0.25087200 |
| O  | -4.59144600 | 1.66404300  | -0.64269900 |
| C  | 3.81131400  | 0.87713000  | 0.25093400  |
| O  | 4.59171700  | 1.66366000  | 0.64300000  |

**2b**

|    |             |             |             |
|----|-------------|-------------|-------------|
| Ti | 1.32027800  | -1.15561200 | -0.08892800 |
| Ni | 0.13305100  | 1.07093800  | 0.05241300  |
| Ni | -1.32873500 | -0.77274600 | -0.19895500 |
| O  | 2.23824500  | -1.92298600 | 1.07324800  |
| O  | -0.14278600 | -2.05560100 | -0.64633800 |
| C  | -2.42898500 | 0.44843800  | 0.23294300  |
| O  | -3.15931100 | 1.30649000  | 0.57410800  |
| C  | 1.41624700  | 2.17650800  | -0.15445400 |
| O  | 2.37753700  | 2.83765000  | -0.30243900 |

**2c**

|    |             |             |             |
|----|-------------|-------------|-------------|
| Ti | -1.89535700 | -0.57984300 | -0.20942800 |
| Ni | -0.63716200 | 1.49589600  | -0.16638000 |
| Ni | 0.86285000  | -0.49976200 | 0.01437800  |
| O  | -3.22943300 | -0.94066100 | 0.73469800  |
| O  | -0.57633100 | -1.75051200 | -0.12371800 |
| C  | 2.47535100  | -1.16647100 | -0.00631100 |
| O  | 3.59317100  | -1.50185300 | -0.01866200 |
| C  | 1.15944200  | 1.28842100  | 0.21204300  |
| O  | 1.90882400  | 2.20966400  | 0.36131900  |

**3a**

|    |             |             |             |
|----|-------------|-------------|-------------|
| Ti | 0.25724000  | -0.32385100 | -0.14572400 |
| Ni | 2.85357700  | -0.06601100 | -0.40402200 |
| Ni | -2.34404200 | -0.43786400 | 0.25440300  |
| O  | 1.46268400  | -0.54468100 | -1.45492500 |
| O  | -0.87349600 | -1.55400900 | 0.41578400  |
| C  | -3.96620200 | 0.14289000  | 0.31284500  |
| O  | -5.06769700 | 0.52837700  | 0.35598900  |
| C  | 3.95226600  | 0.41162300  | 0.79034700  |
| O  | 4.68111800  | 0.74429600  | 1.65018500  |
| C  | -1.32620700 | 1.13114400  | -0.31277900 |
| O  | -1.68828200 | 2.21592800  | -0.63543500 |

**3b**

|    |             |             |             |
|----|-------------|-------------|-------------|
| Ti | -1.32290100 | -1.22185700 | 0.00013500  |
| Ni | -0.67766500 | 1.13774900  | 0.00001400  |
| Ni | 1.32059400  | -0.32749800 | -0.00013400 |
| O  | -2.62679000 | -2.27419300 | -0.00046500 |
| O  | 0.28894100  | -1.94192400 | -0.00012900 |
| C  | 3.04644500  | -0.60330300 | 0.00019800  |
| O  | 4.20777400  | -0.70459800 | 0.00052800  |
| C  | 1.21444400  | 1.47035100  | -0.00022900 |
| O  | 1.71483900  | 2.55493900  | -0.00042300 |
| C  | -2.42488200 | 1.13937100  | 0.00025300  |
| O  | -3.57404200 | 1.38519200  | 0.00036900  |

**3c**

|    |             |             |             |
|----|-------------|-------------|-------------|
| Ti | 0.18789900  | -0.01360500 | -0.02098100 |
| Ni | 2.77528900  | -0.41398400 | -0.36494300 |
| Ni | -2.42578000 | 0.06830000  | 0.08784000  |
| O  | 1.22130500  | -0.86469300 | -1.18335000 |
| O  | -0.97612700 | -0.99104200 | 0.84869200  |
| C  | -4.13035300 | -0.39398800 | 0.19062700  |
| O  | -5.28796600 | -0.53375500 | 0.25878200  |
| C  | 4.06503600  | 0.15383100  | 0.57062400  |
| O  | 4.93119900  | 0.57243300  | 1.24570500  |
| C  | -1.48679500 | 1.47540100  | -0.41783700 |
| O  | -0.46433000 | 2.13793300  | -0.39983200 |

**3d**

|    |             |             |             |
|----|-------------|-------------|-------------|
| Ti | 1.27756700  | -0.63664800 | 0.46700000  |
| Ni | -0.58427600 | 1.05850700  | -0.00422800 |
| Ni | -1.44647200 | -1.09013100 | -0.04913700 |
| O  | 2.23663900  | -0.63007600 | 1.83599200  |
| O  | 0.03971600  | -1.99408700 | 0.25628500  |
| C  | -2.82223100 | -0.13257300 | -0.33259200 |
| O  | -3.78442300 | 0.51530500  | -0.53102600 |
| C  | 0.51863800  | 2.34321700  | 0.13748800  |
| O  | 1.26138200  | 3.23963200  | 0.25850500  |
| C  | 2.71658700  | -0.51881100 | -1.10770700 |
| O  | 3.53125100  | -0.53818300 | -1.94011600 |

**3e**

|    |             |             |             |
|----|-------------|-------------|-------------|
| Ti | 1.12375000  | -0.56123200 | 0.24187200  |
| Ni | -0.73555700 | 1.03499200  | 0.06388700  |
| Ni | -1.49809700 | -1.16654500 | -0.11364900 |
| O  | 2.83153600  | -0.64251200 | 1.01146800  |
| O  | 0.11089600  | -1.98659100 | -0.10014300 |
| C  | -2.90196800 | -0.20653800 | -0.10971300 |
| O  | -3.88509600 | 0.44078500  | -0.07647100 |
| C  | 0.34214400  | 2.35306400  | -0.05235500 |
| O  | 1.07327200  | 3.26776900  | -0.06069500 |
| C  | 3.09241900  | -0.42388500 | -0.37531300 |
| O  | 4.19741900  | -0.36760800 | -0.86210600 |

**3f**

|    |             |             |             |
|----|-------------|-------------|-------------|
| Ti | -1.45742000 | -0.16432200 | 0.20553700  |
| Ni | 0.10057300  | 1.63948700  | -0.05133800 |
| Ni | 1.26406800  | -0.56906000 | -0.00035300 |
| O  | -3.20216000 | 0.35435100  | 0.98216900  |
| O  | -0.40519100 | -1.53267200 | 0.14232700  |
| C  | 2.69737400  | -1.56814200 | -0.09928500 |
| O  | 3.71643000  | -2.12845100 | -0.16486400 |
| C  | 1.89331400  | 1.13380600  | -0.02886400 |
| O  | 2.78639400  | 1.92593500  | -0.06109900 |
| C  | -3.44608000 | -0.42622900 | -0.36645800 |
| O  | -4.52226800 | -0.55964600 | -0.91188700 |

**3g**

|    |             |             |             |
|----|-------------|-------------|-------------|
| Ti | 1.79877800  | -0.38171700 | 0.17495600  |
| Ni | -0.09952100 | -1.76021500 | -0.45418600 |
| Ni | -0.88380400 | 0.50889300  | 0.14153500  |
| O  | 2.79034000  | -0.84419500 | 1.41823200  |
| O  | 0.90021000  | 1.33670000  | 0.35270500  |
| C  | -2.17859900 | 1.67920500  | 0.31225100  |
| O  | -3.10920600 | 2.36866400  | 0.42092200  |
| C  | -1.75800000 | -1.08131800 | -0.08139200 |
| O  | -2.79527200 | -1.67181200 | -0.11338900 |
| C  | 1.99436400  | 1.55732700  | -0.64030200 |
| O  | 2.16560300  | 2.62358300  | -1.15823700 |

**4a**

|    |             |             |             |
|----|-------------|-------------|-------------|
| Ti | -0.00005700 | -0.51450000 | -0.00029900 |
| Ni | 2.62456500  | -0.30828500 | -0.33500800 |
| Ni | -2.62482100 | -0.30902500 | 0.33461800  |
| O  | 1.23417700  | -1.30780300 | -1.00769100 |
| O  | -1.23444500 | -1.30993000 | 1.00521600  |
| C  | -4.21845400 | 0.29960100  | 0.07964900  |
| O  | -5.30163800 | 0.70110100  | -0.08628200 |
| C  | 4.21849000  | 0.29963400  | -0.08006300 |
| O  | 5.30185500  | 0.70078200  | 0.08559400  |
| C  | -1.55021500 | 0.76994600  | -0.87553100 |
| O  | -1.85723300 | 1.59632400  | -1.66450000 |
| C  | 1.55081100  | 0.76774900  | 0.87767100  |
| O  | 1.85786400  | 1.59228900  | 1.66855500  |

**4b**

|    |             |             |             |
|----|-------------|-------------|-------------|
| Ti | 1.13852200  | -1.65478800 | -0.22581400 |
| Ni | 0.73215500  | 1.02847100  | 0.40683600  |
| Ni | -1.32777400 | -0.28925600 | -0.11081600 |
| O  | 2.22037200  | -2.17460300 | -1.38438700 |
| O  | -0.55776100 | -1.98751000 | -0.56561400 |
| C  | -3.07777600 | -0.44503100 | -0.06869900 |
| O  | -4.23848100 | -0.47295200 | -0.00280800 |
| C  | 1.69926500  | 2.23185600  | -0.47793600 |
| O  | 2.37470200  | 2.95558400  | -1.08831700 |
| C  | 1.35618000  | -0.16876200 | 1.54484800  |
| O  | 1.71407500  | -1.27028200 | 1.91618200  |
| C  | -1.13307500 | 1.51873100  | 0.02249900  |
| O  | -1.69261900 | 2.56057900  | -0.05567300 |

**4c**

|    |             |             |             |
|----|-------------|-------------|-------------|
| Ti | 1.22158500  | -1.41759800 | 0.08428900  |
| Ni | 0.70874200  | 1.01476500  | -0.01794000 |
| Ni | -1.38533700 | -0.38587600 | 0.00583600  |
| O  | 2.39348000  | -2.59150400 | -0.08231000 |
| O  | -0.40771500 | -2.04999800 | 0.09324600  |
| C  | -3.11933200 | -0.60899800 | -0.00209500 |
| O  | -4.28170200 | -0.67633200 | -0.01135100 |
| C  | -1.21419200 | 1.43611600  | -0.07040200 |
| O  | -1.79099200 | 2.46955600  | -0.12186600 |
| C  | 1.47994600  | 1.13027700  | 1.57926600  |
| O  | 1.99899400  | 1.27995200  | 2.61935000  |
| C  | 1.53935800  | 0.99511100  | -1.58918500 |
| O  | 2.08232400  | 1.05123000  | -2.62468600 |

**4d**

|    |             |             |             |
|----|-------------|-------------|-------------|
| Ti | -1.93030100 | 0.00090200  | 0.10530600  |
| Ni | 0.55906600  | 0.81349400  | -0.11257200 |
| Ni | 0.21828500  | -1.74091600 | -0.10428800 |
| O  | -3.51831800 | 0.51888300  | 0.17497500  |
| O  | -1.57241700 | -1.76766900 | 0.00926300  |
| C  | 1.91275100  | -1.74144500 | -0.27114200 |
| O  | 3.07364100  | -1.81171700 | -0.39836200 |
| C  | -0.31886400 | 1.35368800  | -1.55439200 |
| O  | -0.79367900 | 1.83246900  | -2.51188000 |
| C  | 2.13506000  | 1.54859700  | 0.23242100  |
| O  | 3.13191000  | 2.10236800  | 0.45970400  |
| C  | -0.43958600 | 0.72295400  | 1.59792000  |
| O  | -0.20055800 | 0.95631900  | 2.73211300  |

**4e**

|    |             |             |             |
|----|-------------|-------------|-------------|
| Ti | -1.70733800 | -0.44425000 | -0.34762800 |
| Ni | 0.83672700  | 0.73416900  | -0.10732200 |
| Ni | 0.74054000  | -1.65759600 | 0.12576100  |
| O  | -2.88255700 | -0.45547600 | -1.53420200 |
| O  | -0.98288000 | -2.05675100 | 0.11255100  |
| C  | 2.40808800  | -1.30904000 | 0.08461000  |
| O  | 3.57739900  | -1.21627800 | 0.05345600  |
| C  | -0.54413000 | 1.64660400  | -0.75275000 |
| O  | -1.02460800 | 2.60553900  | -1.23633400 |
| C  | -2.73656100 | 0.45279400  | 1.31485400  |
| O  | -3.33394400 | 0.90129000  | 2.20058600  |
| C  | 2.10687900  | 1.86722200  | 0.31245200  |
| O  | 2.89562800  | 2.68217200  | 0.57600900  |



**4f**

|    |             |             |             |
|----|-------------|-------------|-------------|
| Ti | -0.31123400 | -0.80558000 | 0.30873900  |
| Ni | -2.78948600 | 0.36768700  | 0.50712800  |
| Ni | 2.33769000  | 0.32138800  | -0.47569500 |
| O  | -1.22128700 | 0.29986000  | 1.37080700  |
| O  | -0.11780200 | -2.32241000 | 0.93914400  |
| C  | 3.56550200  | -0.81587000 | 0.16199500  |
| O  | 4.34041100  | -1.55896700 | 0.60109000  |
| C  | -4.16115900 | 0.23271800  | -0.48069300 |
| O  | -5.08976400 | 0.11919800  | -1.18989500 |
| C  | 1.06973900  | -0.24143300 | -1.56038800 |
| O  | 0.02518400  | -0.69804400 | -1.94368400 |
| C  | 2.36535300  | 2.00210600  | 0.14054500  |
| O  | 2.37086300  | 3.08080400  | 0.56739300  |

**4g**

|    |             |             |             |
|----|-------------|-------------|-------------|
| Ti | 0.39925400  | -0.19981400 | -0.59948000 |
| Ni | 3.04428200  | -0.43023300 | -0.25610600 |
| Ni | -2.32268600 | -0.32890600 | 0.11344400  |
| O  | 1.82237600  | -0.68038800 | -1.55714400 |
| O  | -0.84414000 | -1.40706100 | -0.28374300 |
| C  | -2.60919200 | 1.39687300  | 0.22715600  |
| O  | -2.97928100 | 2.49772000  | 0.33424600  |
| C  | 3.95666100  | -0.18356600 | 1.15136800  |
| O  | 4.56015600  | -0.00776200 | 2.14196600  |
| C  | 0.29465400  | 1.89215300  | -0.36493500 |
| O  | 0.30921200  | 3.05371000  | -0.28032100 |
| C  | -3.81038100 | -1.22964700 | 0.44909900  |
| O  | -4.86566500 | -1.65660400 | 0.69587000  |

**4h**

|    |             |             |             |
|----|-------------|-------------|-------------|
| Ti | -1.24768400 | -0.96349800 | -0.47186300 |
| Ni | -0.37537200 | 1.28642700  | 0.12267900  |
| Ni | 1.49145100  | -0.33814800 | -0.15694000 |
| O  | -2.47889500 | -1.42551800 | -1.52039000 |
| O  | 0.35008000  | -1.75266500 | -0.66882000 |
| C  | 3.18436700  | -0.78216300 | -0.13648400 |
| O  | 4.32820400  | -0.99287300 | -0.09253700 |
| C  | 1.53784000  | 1.36792600  | 0.39301400  |
| O  | 2.10372300  | 2.34729500  | 0.76916400  |
| C  | -2.00304700 | 1.63712700  | -0.40235900 |
| O  | -3.02967900 | 2.09095300  | -0.72160700 |
| C  | -1.95592600 | -1.35149300 | 1.53591700  |
| O  | -2.32100400 | -1.59009500 | 2.60915900  |

**4i**

|    |             |             |             |
|----|-------------|-------------|-------------|
| Ti | 1.57885400  | -0.21061900 | -0.34639100 |
| Ni | -1.09011600 | 0.65410200  | -0.00545700 |
| Ni | -0.65705600 | -1.67568300 | -0.02240000 |
| O  | 3.36996100  | 0.18235100  | -0.78074700 |
| O  | 1.10709800  | -1.91104500 | -0.26266200 |
| C  | -2.32830200 | -1.37233400 | 0.19749200  |
| O  | -3.49034400 | -1.45574900 | 0.35011500  |
| C  | 0.29860700  | 1.73868000  | -0.23617600 |
| O  | 0.78704400  | 2.80700600  | -0.38069800 |
| C  | -2.50052100 | 1.68105100  | 0.14359500  |
| O  | -3.40093400 | 2.41437800  | 0.23291200  |
| C  | 3.34412400  | 0.21481500  | 0.62186400  |
| O  | 4.28999900  | 0.42113600  | 1.34607300  |

**4j**

|    |             |             |             |
|----|-------------|-------------|-------------|
| Ti | -1.20534900 | -0.64430900 | -0.32479800 |
| Ni | 0.03626700  | 1.42097600  | 0.00326300  |
| Ni | 1.54444600  | -0.53682000 | -0.00661000 |
| O  | -2.92047200 | -1.25925200 | -0.87960500 |
| O  | 0.09950500  | -1.77276300 | -0.24949500 |
| C  | 3.11080600  | -1.31963400 | 0.06423700  |
| O  | 4.18548000  | -1.76189200 | 0.12154200  |
| C  | 1.93902200  | 1.19952700  | 0.18432400  |
| O  | 2.69251100  | 2.11157200  | 0.33086400  |
| C  | -1.62309700 | 1.96932400  | -0.06437300 |
| O  | -2.64693300 | 2.53544300  | -0.10840100 |
| C  | -2.99852900 | -1.26798700 | 0.50531800  |
| O  | -3.94903000 | -1.61172700 | 1.17287300  |

**4k**

|    |             |             |             |
|----|-------------|-------------|-------------|
| Ti | 0.80035300  | 1.24702200  | 0.36942400  |
| Ni | 1.02991800  | -0.88038800 | -0.45172300 |
| Ni | -1.21419600 | -0.22153800 | -0.04181900 |
| C  | 2.65899100  | -0.15077500 | 0.33628200  |
| C  | -1.21079400 | 1.69795500  | -0.69437200 |
| O  | 2.57888700  | 1.07006700  | 0.99564200  |
| O  | -2.13913400 | 1.94814000  | -1.45018900 |
| O  | 3.69971100  | -0.79981600 | 0.27659100  |
| O  | -0.25411200 | 2.63279500  | -0.35932400 |
| C  | -2.58956000 | -0.51687800 | 1.01287900  |
| C  | -0.51879300 | -1.92826200 | -0.51389600 |
| O  | -3.44397100 | -0.66520500 | 1.79103200  |
| O  | -0.75225900 | -3.08508100 | -0.64794000 |
